# Supplementary material for: Slightly and Moderately Lame Cows in Tie Stalls Behave Differently From Non-lame Controls. A Matched Case-Control Study
Source: Front Vet Sci. 2020 Dec 17;7:594825. doi: 10.3389/fvets.2020.594825 (PMC7773726; doi:10.3389/fvets.2020.594825)
Supplement: Supplementary file 3 [file Data_Sheet_2.xlsx]

## Sheet: stat_data
Farm_ID	Cow_ID	pair_ID	final LS	lameness	missing_halter	missing_pedo	heat	dry_cow	subclinical_ketosis	metritis	cow_birthdate	age_years	breed	breed_category	parity	last_calving	dim	summarytype	otheractivity	idle	ruminatetime	eattime	drinktime	otherchews	ruminatechews	eatchews	drinkgulp	bolus	chewsperminute	chewsperbolus	laytime	standtime	walktime	standup	laydown	lyingboutdur	standingboutdur	examination1	examination2	generalcondition	generalcondition2	posture	posture2	carecondition	carecondition2	heartrate	heartrate2	respiratoryrate	respiratoryrate2
farm_1	cow_1	pair_1	1.25	none	0	0	0	0	0	0	2014-03-27	3.69062	Braunvieh	dairy	2	27.06.2017	160	mean-24h	618.283	631.341	415.534	392.8	13.0583	2902.5	25621	31835.5	186	453	67.8796	56.3852	771.667	666.417	2.25	7.5	7.5	102.889	88.8555	2017-12-04 14:07:50	2017-12-07 13:29:00	0	0	0	0	0	1	72	68	28	24
farm_1	cow_2	pair_1	2.5	slight	0	0	0	0	0	0	2014-01-05	3.91239	Holstein	dairy	2	29.04.2017	219	mean-24h	492.134	495.8	511.692	431.159	3.66667	2237.5	32915.5	33124	43	488	68.7057	66.5727	774.417	665.25	0.666667	4	4.5	172.093	166.312	2017-12-04 14:16:50	2017-12-07 13:33:00	0	0	0	0	1	1	76	76	28	28
farm_1	cow_3	pair_2	1.75	none	0	0	0	0	0	0	2011-01-02	6.92129	Kreuzung	dual-purpose	5	27.04.2017	221	mean-24h	371.167	401.717	549.025	488.375	30.55	1328	34316.5	37579	646.5	530.5	66.4061	64.0045	774.833	665	0.5	10	10	77.4834	66.5	2017-12-04 14:05:31	2017-12-07 13:28:00	0	0	0	0	0	0	60	68	32	28
farm_1	cow_4	pair_2	2.5	slight	0	0	0	0	0	0	2010-10-16	7.13484	Kreuzung	dual-purpose	5	29.09.2017	66	mean-24h	549.433	556.659	518.208	363.1	7.225	2029.5	32583	24524	110	590	68.8131	55.0436	673	766.917	0.416666	2.5	2.5	269.2	306.767	2017-12-04 13:34:24	2017-12-07 13:21:00	0	0	1	1	1	1	80	76	28	30
farm_2	cow_5	pair_3	1.75	none	0	0	0	0	0	0	2011-02-15	6.84189	Rotfleckvieh	dual-purpose	5	05.09.2017	105	mean-24h	392.733	399.084	556.25	484.134	6.35	1560	35612.5	35370.5	118.5	507	68.1189	67.8068	705.667	734	0.666667	10	9.5	74.2807	73.4	2017-12-19 12:45:46	2017-12-22 08:43:07	0	0	0	0	1	1	82	72	28	28
farm_2	cow_6	pair_3	2.5	slight	0	0	0	0	0	0	2010-11-04	7.12389	Rotfleckvieh	dual-purpose	5	13.09.2017	97	mean-24h	366.659	373.558	492.616	570.559	6.9	1284	30337.5	45130	125.5	517	66.5746	58.823	682.417	757.5	0.416666	11	11	62.0379	68.8636	2017-12-19 12:23:11	2017-12-22 08:56:19	0	0	1	0	1	1	76	68	32	24
farm_3	cow_7	pair_5	1.5	none	0	0	0	0	0	0	2011-10-01	6.31075	Simmental	dual-purpose	4	16.07.2017	190	mean-24h	386.817	409.642	514.759	512.35	22.825	1663.5	29344.5	36821	381.5	454	60.0905	62.3363	765.833	672.833	1.66667	10.5	10.5	72.9365	64.0794	2018-01-22 09:49:00	2018-01-25 07:43:00	0	0	0	0	0	0	72	76	28	26
farm_3	cow_8	pair_5	2.75	slight	0	0	0	0	0	0	2011-04-26	6.74333	Rotfleckvieh	dual-purpose	5	14.07.2017	192	mean-24h	421.183	423.642	524.784	491.625	2.45833	2211	30675.5	34139.5	41	608.5	63.8197	49.5377	673.667	765.417	1.25	12.5	12.5	53.8933	61.2334	2018-01-22 09:49:00	2018-01-25 07:37:00	0	0	0	0	0	0	76	76	28	26
farm_3	cow_9	pair_6	1.5	none	0	1	0	0	0	0	2013-02-22	4.91444	Simmental	dual-purpose	3	10.08.2017	165	mean-24h	357.408	375.025	513.283	548.442	17.6166	1668.5	28250	36805	256.5	460.5	57.6463	60.1677	NA	NA	NA	NA	NA	NA	NA	2018-01-22 09:47:00	2018-01-25 07:19:00	0	0	0	0	0	0	64	68	32	28
farm_3	cow_10	pair_6	2.5	slight	0	0	0	0	0	0	2012-06-21	5.58795	Kreuzung	dual-purpose	3	08.03.2017	320	mean-24h	504.358	518.175	486.783	435.134	13.8167	1688.5	29383	34245	251.5	542	65.5456	54.1349	864.333	574.333	1.66667	10.5	10.5	82.3175	54.6984	2018-01-22 09:55:00	2018-01-25 07:57:00	0	0	0	0	0	0	72	72	26	28
farm_4	cow_11	pair_7	1.75	none	0	0	0	0	0	0	2009-08-16	8.47365	Simmental	dual-purpose	7	25.05.2017	256	mean-24h	389.367	393.317	528.042	518.325	3.95	1554	32099	37270.5	43	515	66.0115	62.6062	765.25	672.833	2.25	9.5	9.5	80.5526	70.8246	2018-02-05 16:37:41	2018-02-08 08:06:00	0	0	0	0	1	1	72	80	24	28
farm_4	cow_12	pair_7	2.5	slight	0	0	0	0	0	0	2008-08-11	9.48665	Rotfleckvieh	dual-purpose	8	06.01.2018	30	mean-24h	412.534	427.284	561.441	449.55	14.75	1261	35674	32365.5	245	559	67.609	64.0746	565.333	874	0.999999	10.5	10	56.5333	83.2381	2018-02-05 16:25:46	2018-02-08 08:07:00	0	0	0	0	1	1	92	64	32	28
farm_4	cow_13	pair_8	1.75	none	0	0	0	0	0	0	2010-08-27	7.44422	Simmental	dual-purpose	6	24.06.2017	226	mean-24h	453.425	469.392	528.183	441.142	15.9667	1755	30634.5	29904.5	228	581.5	62.8709	52.3813	634.583	804.083	1.66667	14	14.5	43.7644	57.4345	2018-02-05 16:33:20	2018-02-08 08:30:00	0	0	0	0	1	1	92	72	28	26
farm_4	cow_14	pair_8	3	moderate	0	0	0	0	0	0	2009-03-19	8.88433	Rotfleckvieh	dual-purpose	6	20.12.2017	47	mean-24h	431.225	440.392	497.759	499.542	9.16667	2193	28615	36910	109	493	60.8715	58.2196	542.917	897	0.416666	10.5	11	49.356	85.4286	2018-02-05 16:21:10	2018-02-08 08:18:00	0	0	0	0	1	1	80	68	24	24
farm_5	cow_15	pair_9	2	none	0	0	0	0	0	0	2008-12-16	9.14168	Rotfleckvieh	dual-purpose	7	26.05.2017	256	mean-24h	300.858	326.275	601.933	511.183	25.4166	1870	40431.5	38254	301	697.5	72.5066	57.5165	704.333	735.75	0.25	9	9	78.2593	81.75	2018-02-06 16:41:37	2018-02-09 08:56:00	0	0	0	0	0	0	80	80	24	28
farm_5	cow_16	pair_9	2.5	slight	0	0	0	0	0	0	2009-09-21	8.37782	Rotfleckvieh	dual-purpose	7	08.08.2017	182	mean-24h	487.167	505.517	526.909	405.675	18.35	2626	32544.5	25672.5	323	585.5	66.3755	55.6339	645.167	794.833	0.333334	4.5	4.5	143.37	176.63	2018-02-06 16:47:13	2018-02-09 09:01:00	0	0	1	0	0	0	72	76	32	24
farm_5	cow_17	pair_10	1.75	none	0	0	0	0	0	0	2011-02-20	6.96235	Rotfleckvieh	dual-purpose	5	15.12.2017	53	mean-24h	351.709	354.717	635.9	449.008	3.00833	1259	42112	34904.5	66	709.5	71.712	59.3295	639.083	800.25	1	13.5	13.5	47.3395	59.2778	2018-02-06 16:45:56	2018-02-09 09:08:00	0	0	0	0	0	0	64	72	24	24
farm_5	cow_18	pair_10	2.5	slight	0	0	0	0	0	0	2012-01-04	6.09172	Rotfleckvieh	dual-purpose	4	14.12.2017	54	mean-24h	524.15	525.55	465.042	449.708	1.4	3074.5	27130	29494	21	508	62.4986	52.8464	630.417	808.667	1.25	6.5	6	105.07	124.41	2018-02-06 16:50:47	2018-02-09 09:15:00	0	0	0	0	0	0	64	76	28	28
farm_6	cow_19	pair_11	2	none	0	0	0	0	0	0	2014-01-28	4.04107	Swiss Fleckvieh	dual-purpose	2	21.07.2017	206	mean-24h	422.083	432.467	484.308	522.984	10.3834	1784	28514	41849.5	160	467	62.9325	61.121	867.75	571.583	1	9.5	9.5	91.3421	60.1667	2018-02-12 14:24:33	2018-02-15 09:08:40	0	0	0	0	1	1	80	80	24	28
farm_6	cow_20	pair_11	2.5	slight	0	0	0	0	0	0	2014-07-21	3.56468	Simmental	dual-purpose	2	20.09.2017	145	mean-24h	353.341	366.833	526.067	546.267	13.4916	1800	34936	42798.5	209	535.5	71.7446	65.1044	727	709.667	3.66667	11.5	11	66.0909	61.7101	2018-02-12 14:21:00	2018-02-15 09:09:16	0	0	0	0	1	0	84	72	28	28
farm_7	cow_21	pair_12	1.75	none	0	0	0	0	0	0	2011-04-22	6.83094	Rotfleckvieh	dual-purpose	4	28.06.2017	236	mean-24h	350.233	350.233	580.55	509.566	0	1851.5	37738	37538	0	560	69.4365	67.6262	850	590.083	0.333334	11	11	77.2727	53.644	2018-02-19 15:55:00	2018-02-22 17:37:38	0	0	0	0	1	1	84	76	28	28
farm_7	cow_22	pair_12	2.75	slight	0	0	0	0	0	0	2010-03-09	7.95072	Rotfleckvieh	dual-purpose	4	20.10.2017	122	mean-24h	502.808	518.717	522.35	396.884	15.9083	2161.5	31309.5	25369	224.5	546	64.1688	57.4267	587	851.917	1.41667	4.5	5	117.4	189.315	2018-02-19 15:53:00	2018-02-22 17:34:22	0	0	1	2	1	1	92	88	28	32
farm_7	cow_23	pair_13	2	none	0	0	0	0	0	0	2009-03-31	8.8898	Holstein	dairy	5	21.02.2017	363	mean-24h	386.884	404.767	575.841	456.825	17.8834	2403.5	34679	33983.5	284	529.5	63.5554	64.3459	779.5	659.167	1.66667	11.5	11	70.8636	57.3188	2018-02-19 15:50:00	2018-02-22 17:32:10	0	0	0	0	1	1	72	80	24	28
farm_7	cow_24	pair_13	2.5	slight	0	0	0	0	0	0	2009-11-01	8.30116	Rotfleckvieh	dual-purpose	5	28.02.2017	356	mean-24h	NA	NA	NA	NA	NA	NA	NA	NA	NA	NA	NA	NA	964.833	475.167	0.333334	7.5	7.5	128.644	63.3556	2018-02-19 15:49:00	2018-02-22 17:30:10	0	0	1	2	1	1	80	72	28	24
farm_7	cow_25	pair_14	1.75	none	0	0	0	0	0	0	2010-05-26	7.73717	Rotfleckvieh	dual-purpose	5	08.10.2017	134	mean-24h	406.25	417.875	562.508	458.3	11.625	2066.5	36507.5	31945.5	200.5	518.5	68.3199	70.1266	874.417	565.75	0.166667	9	9	97.1574	62.8611	2018-02-19 15:59:00	2018-02-22 17:40:44	0	0	0	0	1	1	88	84	28	28
farm_7	cow_26	pair_14	2.5	slight	0	0	0	0	0	0	2010-09-21	7.4141	Rotfleckvieh	dual-purpose	5	05.02.2018	14	mean-24h	380.841	391.858	674.816	371.808	11.0167	2298	40667.5	25195.5	192.5	569.5	63.5133	70.7679	849.583	589.667	1.08333	9	9.5	89.4298	65.5185	2018-02-19 15:56:00	2018-02-22 17:39:29	0	0	2	2	1	1	72	72	24	28
farm_8	cow_27	pair_15	2	none	0	0	0	0	0	0	2007-11-04	10.3135	Braunvieh	dairy	7	13.06.2017	258	mean-24h	417.325	426.175	498.442	512.475	8.85	1530.5	25133.5	35574	148.5	566	54.5038	44.3582	526.417	912.833	1.08333	5.5	5.5	95.7122	165.97	2018-02-26 10:16:00	2018-03-01 16:03:23	0	0	0	0	1	1	68	76	28	28
farm_8	cow_28	pair_15	3.25	moderate	0	0	0	0	0	0	2008-02-02	10.0671	Braunvieh	dairy	7	02.06.2017	269	mean-24h	452.625	462.817	538.833	436.625	10.1917	1940.5	32345	30158.5	147	605	65.2114	53.513	498.583	941.083	0.666667	5.5	5.5	90.6515	171.106	2018-02-26 10:18:00	2018-03-01 16:04:55	0	0	2	2	1	1	84	72	28	24
farm_8	cow_29	pair_16	2	none	0	0	0	0	0	0	2010-09-28	7.4141	Braunvieh	dairy	5	22.03.2017	341	mean-24h	427.392	430.617	516.517	491.95	3.225	1945	32174	35274.5	62.5	579	68.2296	54.5311	770.25	668	2.16667	11	10.5	73.3571	60.7273	2018-02-26 10:20:00	2018-03-01 16:00:43	0	0	0	0	1	1	64	80	24	28
farm_8	cow_30	pair_16	3	moderate	0	0	0	0	0	0	2010-05-13	7.79192	Braunvieh	dairy	5	30.07.2017	211	mean-24h	454.591	462.933	505.591	471.1	8.34166	1607.5	31264.5	31189.5	138	472	66.2515	64.5256	681.75	758.083	0.5	8.5	8	85.2188	89.1863	2018-02-26 10:16:00	2018-03-01 16:02:30	0	0	1	2	1	1	76	72	32	24
farm_8	cow_31	pair_17	1.75	none	0	0	0	0	0	0	2010-03-19	7.94251	Braunvieh	dairy	5	14.04.2017	318	mean-24h	391.241	400.825	465.859	572.683	9.58332	2080	30248.5	42476	107.5	524.5	70.0768	56.6799	679.5	760.167	0.666667	9	9	75.5	84.4629	2018-02-26 10:16:00	2018-03-01 15:59:08	0	0	0	0	1	1	64	72	20	24
farm_8	cow_32	pair_17	3.25	moderate	0	0	0	0	0	0	2010-07-04	7.64956	Braunvieh	dairy	5	03.06.2017	268	mean-24h	408.175	415.5	514.583	508.725	7.325	1707	27850	31437	136	484	57.7366	56.2465	698.833	740.833	0.666667	10	10.5	66.5556	74.0833	2018-02-26 10:16:00	2018-03-01 15:59:56	0	0	1	2	1	1	68	72	28	24
farm_9	cow_33	pair_18	1.75	none	0	0	0	0	0	0	2015-03-17	3.0089	Original Braunvieh	dual-purpose	1	16.10.2017	155	mean-24h	437.134	442.709	483.742	513	5.575	2317	31835	35965	88	563.5	71.8331	56.2696	934	505.583	0.75	10.5	10	93.4	48.1508	2018-03-20 18:05:51	2018-03-23 15:01:25	0	0	0	0	0	0	76	68	24	24
farm_9	cow_34	pair_18	3	moderate	0	0	0	0	0	0	2014-09-12	3.51814	Original Braunvieh	dual-purpose	1	01.09.2017	200	mean-24h	402.6	419.283	494.95	523.284	16.6834	1924	34385.5	37342	240.5	515	74.9042	67.0525	870.917	568.833	0.583333	11	11	79.1742	51.7121	2018-03-20 17:49:16	2018-03-23 14:55:06	0	0	0	0	0	0	72	76	28	28
farm_9	cow_35	pair_19	2	none	0	0	0	0	0	0	2012-09-29	5.47023	Braunvieh	dairy	3	10.10.2017	161	mean-24h	515.55	538.15	432.716	464.967	22.6	2195.5	26711	29931	335	418	66.2356	63.0936	781.25	658	1.08333	11	11	71.0227	59.8182	2018-03-20 17:57:05	2018-03-23 14:56:52	0	0	0	0	0	0	72	72	24	28
farm_9	cow_36	pair_19	2.5	slight	0	0	0	0	0	0	2012-08-11	5.60438	Original Braunvieh	dual-purpose	3	03.09.2017	198	mean-24h	432.909	464.367	521.483	452.216	31.4583	2588.5	33609.5	30521	475	507.5	69.2182	63.1706	741.083	698.75	0.5	6.5	6.5	114.013	107.5	2018-03-20 17:53:32	2018-03-23 14:47:54	0	0	2	1	0	0	76	64	24	24
farm_10	cow_37	pair_20	1.75	none	0	0	0	0	0	0	2010-03-21	8.05476	Rotfleckvieh	dual-purpose	6	28.06.2017	286	mean-24h	484.658	510.816	533.134	393.592	26.1583	2683.5	31306	30368	419	578	63.5303	52.883	641.167	798.333	0.833333	11.5	11.5	55.7536	69.4203	2018-04-10 10:41:00	2018-04-13 08:43:00	0	0	0	0	1	1	64	84	32	28
farm_10	cow_38	pair_20	2.5	slight	0	0	0	0	0	0	2011-11-06	6.42574	Rotfleckvieh	dual-purpose	5	23.01.2018	77	mean-24h	505.875	512.558	593.159	333.192	6.68333	2552	40633	26008	84.5	600.5	73.3555	65.6749	510.667	928.75	0.916665	8	8	63.8333	116.094	2018-04-10 10:34:00	2018-04-13 08:42:00	0	0	0	0	1	1	76	76	24	28
farm_11	cow_39	pair_21	1.75	none	0	0	0	0	0	0	2011-09-15	6.58727	Simmental	dual-purpose	5	03.03.2018	45	mean-24h	581.659	607.359	462.783	367.45	25.7	2418.5	26051.5	21644.5	367.5	436.5	60.6255	58.5348	745.75	693.75	0.833333	10	10	74.575	69.375	2018-04-17 16:55:00	2018-04-20 08:25:00	0	0	0	0	2	2	68	72	28	24
farm_11	cow_40	pair_21	3	moderate	0	0	0	0	0	0	2010-09-13	7.59206	Simmental	dual-purpose	5	08.12.2016	496	mean-24h	649.975	668.933	401.142	366.692	18.9584	3198	21950	17768	295.5	402.5	60.0941	53.5588	802.333	636.25	1.75	5.5	5.5	145.879	115.682	2018-04-18 10:53:00	2018-04-20 08:26:00	1	1	2	2	2	2	76	84	28	24
farm_12	cow_41	pair_22	2	none	0	0	0	0	0	0	2010-02-28	8.76934	Red Holstein	dairy	7	2018-07-04	155	mean-24h	481.784	496.083	544.6	399.325	14.3	820.5	34139	28860.5	162	560.5	69.0041	60.827	711.917	727.833	0.666667	9	9	79.1018	80.8704	2018-12-06 09:22:00	2018-12-10 09:26:00	0	0	0	0	1	1	80	80	28	28
farm_12	cow_42	pair_22	3.25	moderate	1	0	0	0	0	0	2009-06-23	9.4538	Red Holstein	dairy	6	2018-06-23	166	mean-24h	NA	NA	NA	NA	NA	NA	NA	NA	NA	NA	NA	NA	435.75	1004	0.583333	5	5.5	79.2273	200.8	2018-12-06 09:20:00	2018-12-10 09:25:00	0	0	1	1	1	1	88	84	32	32
farm_12	cow_43	pair_23	2	none	0	0	0	0	0	0	2013-05-27	5.52772	Swiss Fleckvieh	dual-purpose	3	2017-10-08	424	mean-24h	482.866	490.583	546.175	401.592	7.71667	1458.5	34052	27115.5	103.5	512	68.1548	65.659	874.833	564.583	0.916665	11.5	11.5	76.0725	49.0942	2018-12-06 09:18:00	2018-12-10 09:24:00	0	0	0	0	1	1	76	80	24	32
farm_12	cow_44	pair_23	2.75	slight	0	0	0	0	0	0	2013-02-27	5.77139	Vosgienne	dual-purpose	4	2018-09-18	79	mean-24h	557.8	561.308	508.025	369.666	3.50833	1134	30653.5	25285	61.5	546	67.2982	55.7413	551.583	888.583	0.25	4	4	137.896	222.146	2018-12-06 09:17:00	2018-12-10 09:23:00	0	0	2	2	1	1	88	84	32	28
farm_13	cow_45	pair_24	1.75	none	0	0	0	1	0	0	2012-02-11	6.98152	Red Holstein	dairy	5	2018-02-11	358	mean-24h	462.284	490.35	580.575	365.058	28.0666	685	33627.5	24001.5	486.5	521.5	63.1406	63.4239	810.25	626.167	3.91667	6	6	135.042	104.361	2019-02-04 11:16:00	2019-02-07 09:39:00	0	0	0	0	1	0	80	76	32	28
farm_13	cow_46	pair_24	2.5	slight	0	0	0	1	0	0	2008-04-08	10.8255	Rotfleckvieh	dual-purpose	8	2018-04-01	309	mean-24h	571.933	576.808	515.692	346.983	4.875	1448	33474.5	24780	64	588	71.6197	54.9854	683.75	754.583	2.08333	4.5	4.5	151.944	167.685	2019-02-04 11:13:00	2019-02-07 09:38:00	0	0	0	1	1	0	72	72	28	28
farm_14	cow_47	pair_25	1.5	none	0	0	0	0	0	0	2006-12-03	12.2491	Simmental	dual-purpose	10	2018-11-17	107	mean-24h	404.45	431.067	563.058	439.525	26.6166	810.5	35767	28933	343	606.5	70.8858	58.8967	693.667	744.833	1.83333	12.5	12.5	55.4934	59.5866	2019-03-04 09:58:00	2019-03-07 08:14:00	0	0	0	0	0	0	76	76	20	24
farm_14	cow_48	pair_25	2.5	slight	0	0	0	0	0	0	2002-11-23	16.2765	Rotfleckvieh	dual-purpose	14	2018-08-26	190	mean-24h	529.525	547.575	472.508	415.834	18.05	644.5	23873.5	26802	225.5	529	55.5539	44.4275	738.667	701.167	0.5	8.5	9	82.0741	82.4902	2019-03-04 10:00:00	2019-03-07 08:16:00	0	0	0	0	0	0	80	80	18	24
farm_14	cow_49	pair_26	1.75	none	0	0	0	0	0	0	2014-05-24	4.77755	Simmental	dual-purpose	3	2018-12-09	85	mean-24h	429.033	447.041	493.259	497.808	18.0084	607.5	29158	33702	271.5	540.5	65.4156	53.3212	651.333	787.833	1.16667	13	13	50.1026	60.6026	2019-03-04 10:06:00	2019-03-07 08:17:00	0	0	0	0	0	0	76	84	24	24
farm_14	cow_50	pair_26	2.75	slight	0	0	0	0	0	0	2014-09-01	4.50376	Simmental	dual-purpose	3	2019-01-24	39	mean-24h	440.459	451.325	575.225	412.275	10.8667	988.5	31818	25109.5	113	523.5	60.1014	59.2587	720	718.583	1.75	10.5	10.5	68.5714	68.4365	2019-03-04 10:02:00	2019-03-07 08:18:00	0	0	0	0	0	0	80	72	24	20
farm_14	cow_51	pair_27	2	none	0	0	0	0	0	0	2010-03-27	8.93634	Simmental	dual-purpose	7	2018-12-21	73	mean-24h	403.242	419.942	555.391	462.775	16.7	640.5	32977.5	30531	189	493.5	64.9501	66.2462	842.583	596.417	1.33333	11.5	11	76.5985	51.8623	2019-03-04 10:10:00	2019-03-07 08:21:00	0	0	0	0	0	0	88	84	24	26
farm_14	cow_52	pair_27	3	moderate	0	0	0	0	0	0	2011-04-14	7.88775	Simmental	dual-purpose	6	2018-08-30	186	mean-24h	429.667	454.067	518.558	464.884	24.4	774.5	29893	29623.5	329.5	448.5	62.684	66.1364	827.75	612.083	0.5	9	8.5	97.3824	68.0093	2019-03-04 08:09:00	2019-03-07 08:20:00	0	0	0	0	0	0	72	72	22	26
farm_15	cow_53	pair_28	1.75	none	1	0	0	0	0	0	2011-08-26	7.53183	Rotfleckvieh	dual-purpose	4	2018-08-11	209	mean-24h	NA	NA	NA	NA	NA	NA	NA	NA	NA	NA	NA	NA	757.5	682.667	0.166666	8.5	8.5	89.1176	80.3137	2019-03-08 10:22:00	2019-03-11 09:34:00	0	0	0	0	1	1	76	72	28	28
farm_15	cow_54	pair_28	3	moderate	0	0	0	0	0	0	2012-02-10	7.07187	Swiss Fleckvieh	dual-purpose	5	2018-12-01	97	mean-24h	432.492	435.709	514.259	488.267	3.21666	801	27732	34192.5	50	468.5	58.3062	58.5007	739.333	700.333	0.666667	5.5	5.5	134.424	127.333	2019-03-08 10:23:00	2019-03-11 09:35:00	0	0	0	1	1	1	72	68	32	32
farm_15	cow_55	pair_29	2	none	0	0	0	0	0	0	2012-02-14	7.06092	Swiss Fleckvieh	dual-purpose	5	2018-09-02	187	mean-24h	452.517	475.809	593.425	369.683	23.2917	685.5	36909.5	31219.5	390	523.5	67.2019	70.3537	636.417	802.583	1.33333	9.5	9.5	66.9912	84.4825	2019-03-08 10:05:00	2019-03-11 09:26:00	0	0	0	0	1	1	64	68	36	32
farm_15	cow_56	pair_29	3.25	moderate	1	0	0	0	0	0	2012-08-06	6.58453	Swiss Fleckvieh	dual-purpose	5	2019-02-18	18	mean-24h	NA	NA	NA	NA	NA	NA	NA	NA	NA	NA	NA	NA	520.417	916.832	3.16667	5	5	104.083	183.366	2019-03-08 10:12:00	2019-03-11 09:27:00	1	1	1	1	1	1	84	80	36	32
farm_15	cow_57	pair_30	1.75	none	0	0	0	0	0	0	2016-09-26	2.4449	Rotfleckvieh	dual-purpose	1	2018-11-04	124	mean-24h	460.341	465.142	518.625	455.717	4.8	895	35417.5	34285.5	53	543.5	76.9402	64.3353	651.333	787.917	1.08333	8	7.5	86.8444	98.4896	2019-03-08 10:15:00	2019-03-11 09:31:00	0	0	0	0	1	1	84	80	32	32
farm_15	cow_58	pair_30	3	moderate	1	0	0	0	0	0	2016-01-11	3.154	Rotfleckvieh	dual-purpose	1	2018-08-16	204	mean-24h	NA	NA	NA	NA	NA	NA	NA	NA	NA	NA	NA	NA	665.333	770	5	13	12.5	53.2267	59.2308	2019-03-08 10:13:00	2019-03-11 09:30:00	0	0	0	0	1	1	64	72	32	28
farm_16	cow_59	pair_31	2	none	0	0	0	0	0	0	2010-01-17	9.15264	Simmental	dual-purpose	6	2018-04-24	324	mean-24h	521.509	533.909	493.058	407.825	12.4	1642	29385	27229.5	190.5	514	66.0807	56.5812	588.333	847.833	4.25	14.5	14.5	40.5747	58.4713	2019-03-14 10:41:00	2019-03-18 11:55:00	0	0	0	0	1	1	72	68	24	28
farm_16	cow_60	pair_31	2.5	slight	0	0	0	0	0	0	2010-10-18	8.40246	Rotfleckvieh	dual-purpose	7	2019-03-09	5	mean-24h	328.366	331.858	630.933	476.125	3.49167	710	38088.5	34190	54.5	659.5	66.2194	57.3491	562.75	876.833	0.75	7	6.5	86.5769	125.262	2019-03-14 10:43:00	2019-03-18 11:57:00	0	0	1	1	1	1	76	80	28	24
farm_16	cow_61	pair_32	1.75	none	0	0	0	0	0	0	2008-10-03	10.4422	Simmental	dual-purpose	8	2018-05-30	288	mean-24h	442.8	458.192	511.525	470.25	15.3916	1147.5	30876	34622	253	573	66.6913	53.3796	672.667	765.5	2.16667	9.5	9	74.7407	80.5789	2019-03-14 10:35:00	2019-03-18 11:47:00	0	0	0	0	1	1	80	64	24	24
farm_16	cow_62	pair_32	2.75	slight	0	0	0	0	0	0	2010-12-24	8.21903	Simmental	dual-purpose	6	2018-06-27	260	mean-24h	399.633	411.766	538.4	487.858	12.1333	900	30428.5	28451.5	138	557.5	63.5419	54.1888	596.5	843.167	0.666667	4.5	4.5	132.556	187.37	2019-03-14 10:32:00	2019-03-18 11:46:00	0	0	0	0	1	1	64	76	24	22
[truncated: 47 more columns]

## Sheet: legend
Farm_ID	farm indentifier
Cow_ID	cow identifier
pair_ID	pair identifier
final LS	mean of the locomotion scores two indepented experts scored for the same video of the same cow; locomotion scoring according to Flower & Weary 2006
lameness	none: final LS = 1.0 - 2.0; slight: final LS 2.25 - 2.75; moderate: final LS = 3.0 - 3.25
missing_halter	missing data from RumiWatch halter (0 = no; 1 = yes)
missing_pedo	missing data from RumiWatch pedometer (0 = no; 1 = yes)
heat	cow was observed to be in heat within data collection period (0 = no; 1 = yes)
dry_cow	0 = no; 1 = yes
subclinical_ketosis	for all cows <90 days post-partum with ≥1.2 mmol beta-hydroxybutyrate per liter EDTA-whole blood; 0 = no; 1 = yes
metritis	clinical signs of metritis at at least one examination; 0 = no; 1 = yes
cow_birthdate	birthdate of the cow
age_years	age in years of the cow
breed	breed of the cow
breed_category	breed category according to Balmer et al., 2019
parity	number of lactations
last_calving	date of previous calving
dim	days in milk
summarytype	type of RumiWatch summary
otheractivity	time spent for activities other than ruminating, eating or drinking; in min
idle	time spent for activities other than ruminating or eating; in min per
ruminatetime	time spent for ruminating; in min per
eattime	time spent for eating; in min per
drinktime	time spent for drinking; in min per
otherchews	number of chews that could not be classified as rumination chews or eating chews; in 1/chew
ruminatechews	number of rumination chews
eatchews	number of eating chews
drinkgulp	number of drinking gulps
bolus	number of boluses
chewsperminute	number of chews per rumination minute
chewsperbolus	number of chews per rumination bolus
laytime	lying time; in min
standtime	standing time; in min
walktime	walking time; in min
standup	number of rising processes
laydown	number of lying down processes
lyingboutdur	mean duration of a lying bout
standingboutdur	mean duration of a standing bout
examination1	date of clinical examination 1
examination2	date of clinical examination 2
generalcondition	general condition of the cow at examination 1
generalcondition2	general condition of the cow at examination 2
posture	posture of the cow at examination 1
posture2	posture of the cow at examination 2
carecondition	care condition of the cow at examination 1
carecondition2	care condition of the cow at examination 2
heartrate	heart rate per min at examination 1
heartrate2	heart rate per min at examination 2
respiratoryrate	respiratory rate per min at examination 1
respiratoryrate2	respiratoryrate per min at examination 2
rectaltemp	rectal temperature in °C at examination 1
rectaltemp2	rectal temperature in °C at examination 2
rumen peristalsis per 2 min at examination 1	rumen peristalsis freq per min er examination 1
rumenpersitalsisfreq2	rumen persitalsis per 2 min at examination 2
rumenpersitalsisintensity	rumen persitalsis intensity at examination 1
rumenperistalsisintensity2	rumen peristalsis intensity at examination 2
rumenscore	rumen score at examination 1
rumenscore2	rumen score at examination 2
rumenlayering	rumen layering at examination 1
rumenlayering2	rumen layering at examination 2
percussionauscultation	percussion auscultation at examination 1
percussionauscultation2	percussion auscultation at examination 2
swingauscultation	swing auscultation at examination 1
swingauscultation2	swing auscultation at examination 2
doubleauscultation	double auscultation at examination 1
doubleauscultation2	double auscultation at examination 2
bowelperistalsis	bowel peristalsis at examination 1
bowelperistalsis2	bowel peristalsis at examination 2
abdominalwalltension	abdominal wall tension at examination 1
abdominalwalltension2	abdominal wall tension at examination 2
bcs	body condition score according to Edmonson et al., 1989
appetite	appetite at examination 1
appetite2	appetite at examination 2
acetoneblood	acacetone in EDTA whole blood, in mmol/l, assessed at examination 1
lame_sls	lame according to the SLS (Leach et al., 2009)
sls_edge	counts of edge behavior during SLS examination
sls_rest	counts of resting a foot during SLS examination
sls_shift	counts of weight shifting during SLS examonation
sls_uneven	uneven weight bearing while stepping from side to side during SLS examination; 0 = no; 1 = yes
heat	heat signs during clinical examination at examination 1
bleedingoff	bleeding off at examination 1
inseminated	cow was inseminated prior to examination 1
pregnant	cow was confirmed pregnant prior to examination 1
comment	comments
AuslaufWinter	days of outdoor exercise per month
included_min	included minutes in the calculation of proportions from upright and lying time (sum of 5 min summaries, excluded: 5 min intervals, where a posture change occured)
lying	time spent lying down from included_min; in min
upright	time spent upright from included_min; in min
idle_5min	time spent idling from included_min; in min
eating	time spent eating from included_min; in min
ruminating	time spent ruminating from included_min; in min
rel_upright_idle	proportion of time spent idling from total upright time, in %
rel_upright_eat	proportion of time spent idling from total lying time, in %
rel_upright_rumi	proportion of time spent eating from total upright time, in %
rel_lying_idle	proportion of time spent eating from total lying time, in %
rel_lying_eat	proportion of time spent ruminating from total upright time, in %
rel_lying_rumi	proportion of time spent ruminating from total lying time, in %
